# Supplementary material
Source: PubMed Central journal article supplement (PMC2604816)

# Application of the Rh(II)-Cyclization/Cycloaddition Cascade for the Total Synthesis of (±)-Aspidophytine

José M. Meijia-Oneto and Albert Padwa\*

*Department of Chemistry, Emory University, Atlanta, Georgia 30322 USA*

**chemap@emory.edu**

## *Table of Contents for Spectra*

|         |                                                                                        |
|---------|----------------------------------------------------------------------------------------|
| Page 2  | <sup>1</sup> H-NMR (400 MHz, CDCl <sub>3</sub> ) of compound <b>15</b>                 |
| Page 3  | <sup>1</sup> H-NMR (400 MHz, CDCl <sub>3</sub> ) of Precursor A to compound <b>16</b>  |
| Page 4  | <sup>13</sup> C-NMR (100 MHz, CDCl <sub>3</sub> ) of Precursor B to compound <b>16</b> |
| Page 5  | <sup>1</sup> H-NMR (400 MHz, CDCl <sub>3</sub> ) of compound <b>16</b>                 |
| Page 6  | <sup>1</sup> H-NMR (400 MHz, CDCl <sub>3</sub> ) of compound <b>10</b>                 |
| Page 7  | <sup>1</sup> H-NMR (400 MHz, CDCl <sub>3</sub> ) of compound <b>11</b>                 |
| Page 8  | <sup>1</sup> H-NMR (400 MHz, CDCl <sub>3</sub> ) of Precursor compound <b>27</b>       |
| Page 9  | <sup>1</sup> H-NMR (400 MHz, CDCl <sub>3</sub> ) of compound <b>27</b>                 |
| Page 10 | <sup>1</sup> H-NMR (400 MHz, CDCl <sub>3</sub> ) of Precursor compound <b>28</b>       |
| Page 11 | <sup>1</sup> H-NMR (400 MHz, CDCl <sub>3</sub> ) of compound <b>28</b>                 |
| Page 12 | <sup>1</sup> H-NMR (400 MHz, CDCl <sub>3</sub> ) of compound <b>29</b>                 |
| Page 13 | <sup>1</sup> H-NMR (400 MHz, CDCl <sub>3</sub> ) of compound <b>5</b> (aspidophytine)  |

STANDARD 1H OBSERVE

exptl std1h

|             |             |            |           |
|-------------|-------------|------------|-----------|
| date        | Aug 28 2005 | DEC. & VI  | 399.940   |
| solvent     | cdcl3       | dn         | H1        |
| file        | exp         | dpwr       | 30        |
| ACQUISITION | dot         | dmf        | -630.7    |
| sfrq        | 399.941     | dm         | nmn       |
| tn          | H1          | dmm        | C         |
| at          | 2.202       | dmf        | 200       |
| np          | 22912       | dseq       |           |
| sw          | 5203.3      | dres       | 1.0       |
| fb          | 3000        | homo       | n         |
| bs          | 1           | PROCESSING |           |
| tpwr        | 58          | lb         | 0.20      |
| pw          | 8.0         | wfille     |           |
| dl          | 1.000       | proc       | fi        |
| tof         | 207.0       | fn         | not used  |
| nt          | 30          | math       | f         |
| ct          | 30          |            |           |
| atlock      | n           | werr       | react     |
| gain        | not used    | wexp       | procpilot |
| flags       | n           | wbs        |           |
| in          | n           | wnt        |           |
| dp          | y           |            |           |
| hs          | nn          |            |           |

DISPLAY

SP -386.3  
 WP 5203.3  
 VS 144  
 SC 0  
 WC 250  
 hzmm 20.81  
 IS 321.82  
 rfl 3293.8  
 rfp 2907.6  
 th 20  
 ins 1.000  
 nm cdc ph 1.000

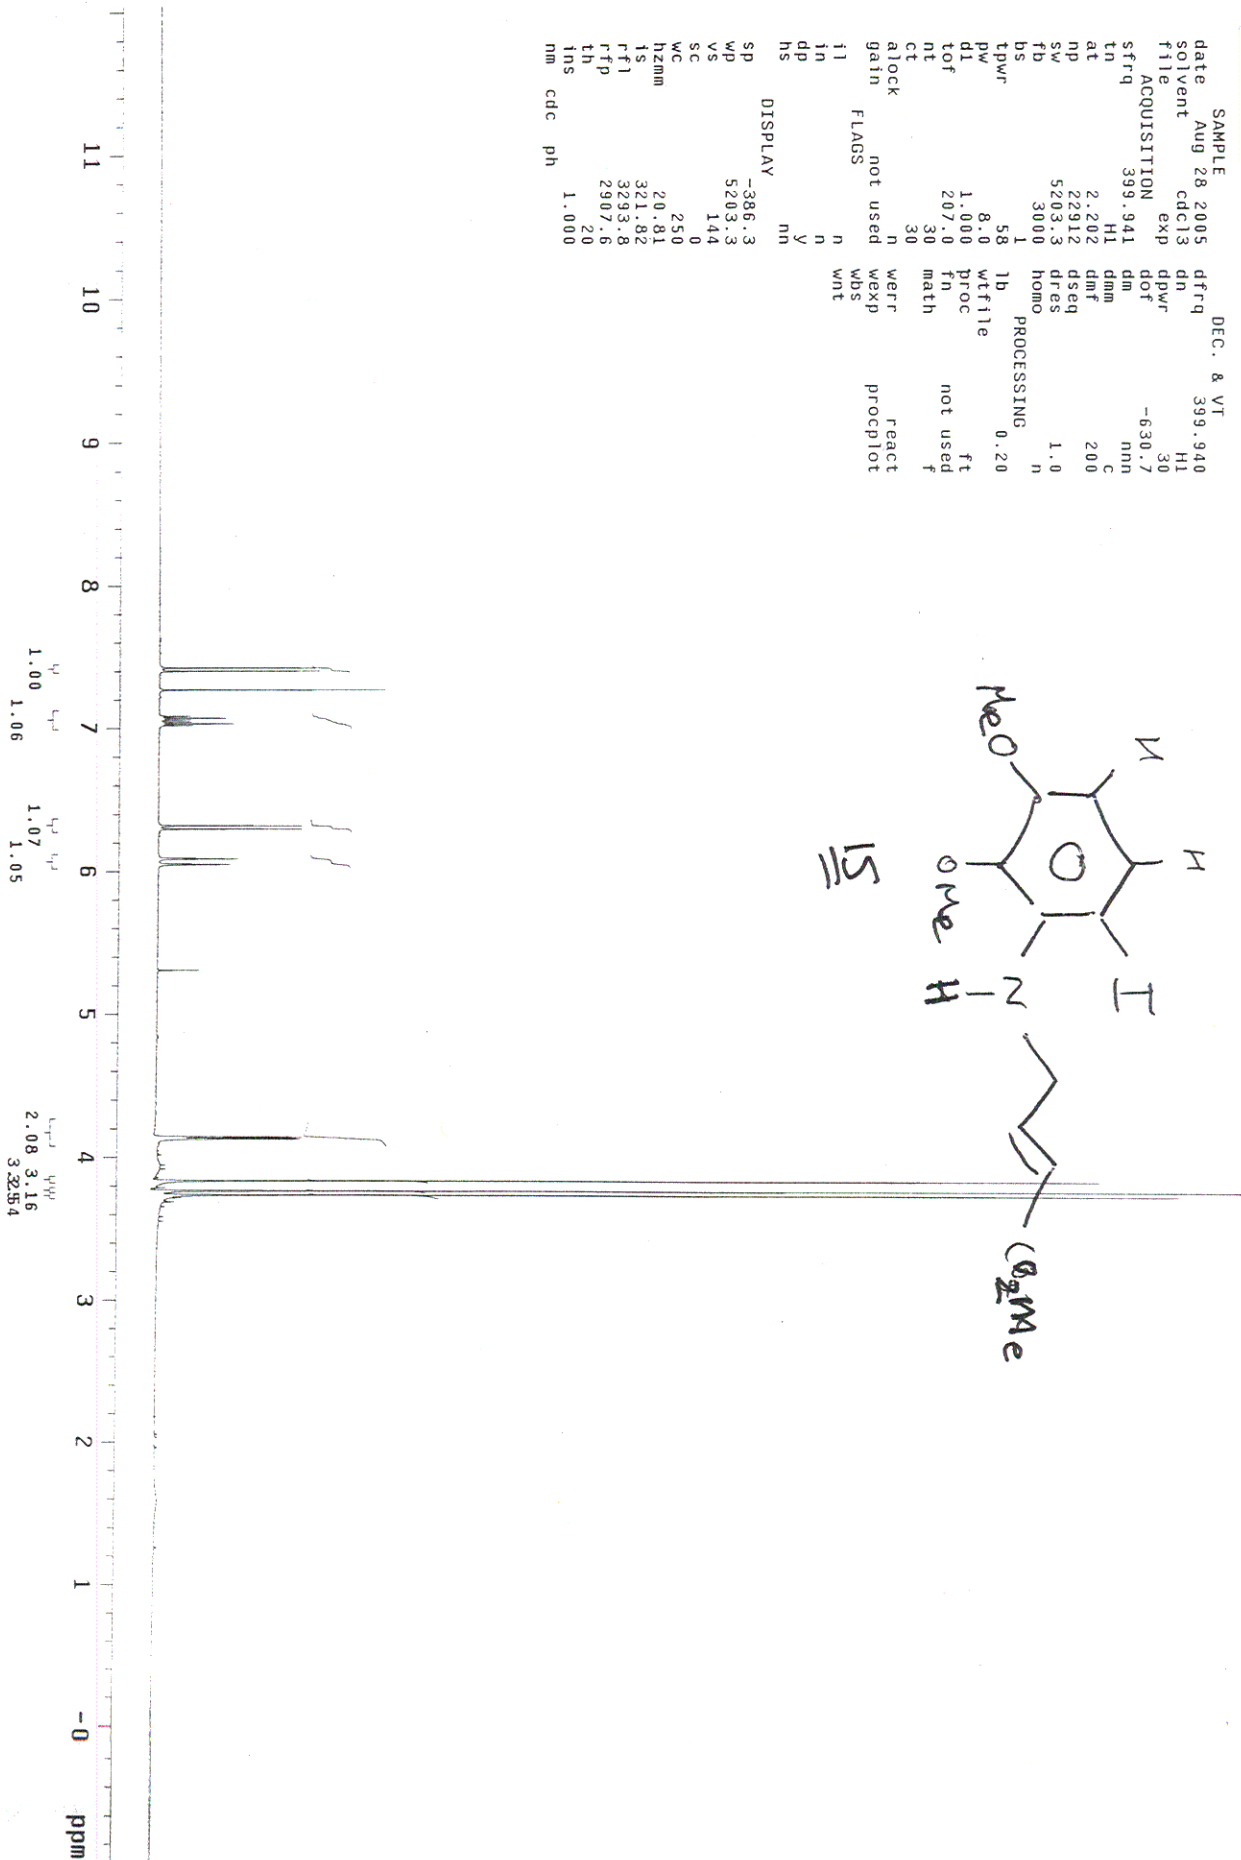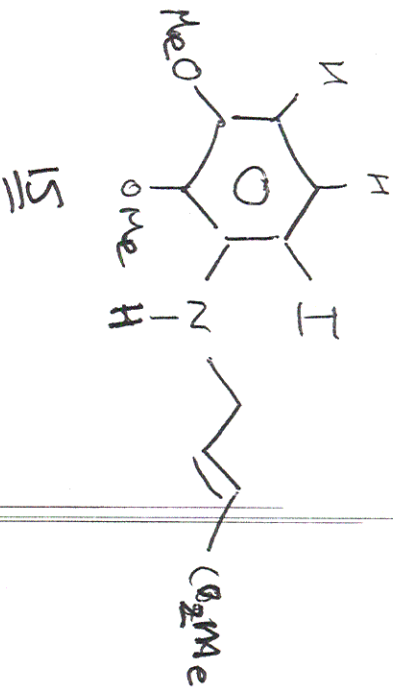

Integration values:  
 1.00  
 1.06  
 1.07  
 1.05  
 2.08  
 3.16  
 3.23

expt stidh

SAMPLE DEC. & VI  
 date Aug 30 2005 dfrrq 399.940  
 solvent cdc13 dn H1  
 file exp dpwr H1  
 ACQUISITION exp 30  
 sffrq 399.941 dm -630.7  
 tn H1 dmm nnn  
 at 2.202 dmf C  
 np 22912 dseq 200  
 sw 5203.3 dres 1.0  
 fb 3000 homo n  
 bs 1 PROCESSING 0.20  
 tpwr 58 lb wlfite  
 pw 8.0 wlfite  
 dl 1.000 pproc ft  
 tof 207.0 fn not used  
 nt 20 math  
 ct 20  
 alock n  
 gain not used  
 flags not used  
 in n  
 dp n  
 hs y mn  
 DISPLAY  
 sp -386.0  
 wp 5203.3  
 vs 144  
 sc 0  
 wc 250  
 hzmm 20.81  
 ts 288.32  
 rfi 3293.5  
 rfp 2907.6  
 th 20  
 ins 6.000  
 nm cdc ph

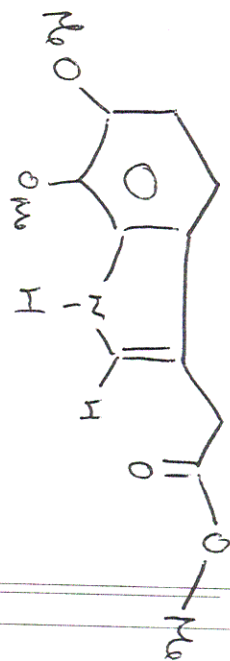

Precursor A to  
 compound 16

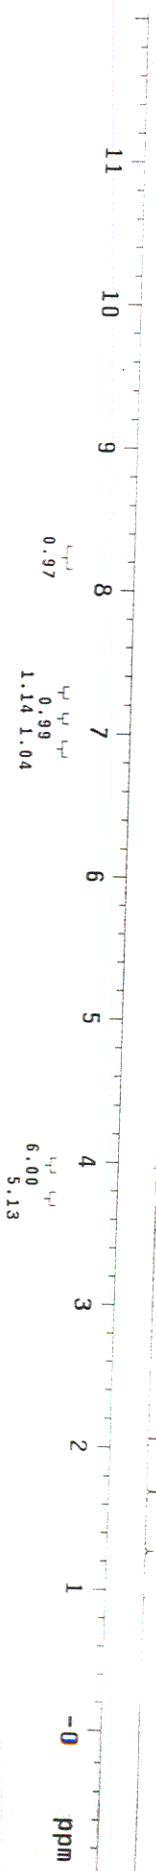

13C OBSERVE

exptl std13c  
SAMPLE date Sep 1 2005 dfrq DEC. & VI 399.941  
solvent cdc13 dn H1  
file exp -200.0  
ACQUISITION 100.574 dof 42  
sfrq C13 dmm yyy w  
tn 1.199 dmf 7200  
at 59968 dresq  
np 25000.0 dresq 1.0  
sw 14000 homo  
fb 10 PROCESSING 2.00  
bs tpwr 58 lb  
pw 8.0 1sfid 4  
DI 3.000 wtfille  
tof 0 proc ft  
nt 1e+06 fn not used f  
ct 150 math  
alock n  
gain 50 werr react  
ll 11 flags wexp procpilot  
ln n wbs teststn  
dp n y  
hs mn  
DISPLAY  
sp -23986.6  
wd 25000.0  
vs 368  
sc 0  
wc 250  
hzmm 100.00  
is 500.00  
rfl 10753.2  
rfp 7766.6  
th 19  
ins 100.000  
nm no ph

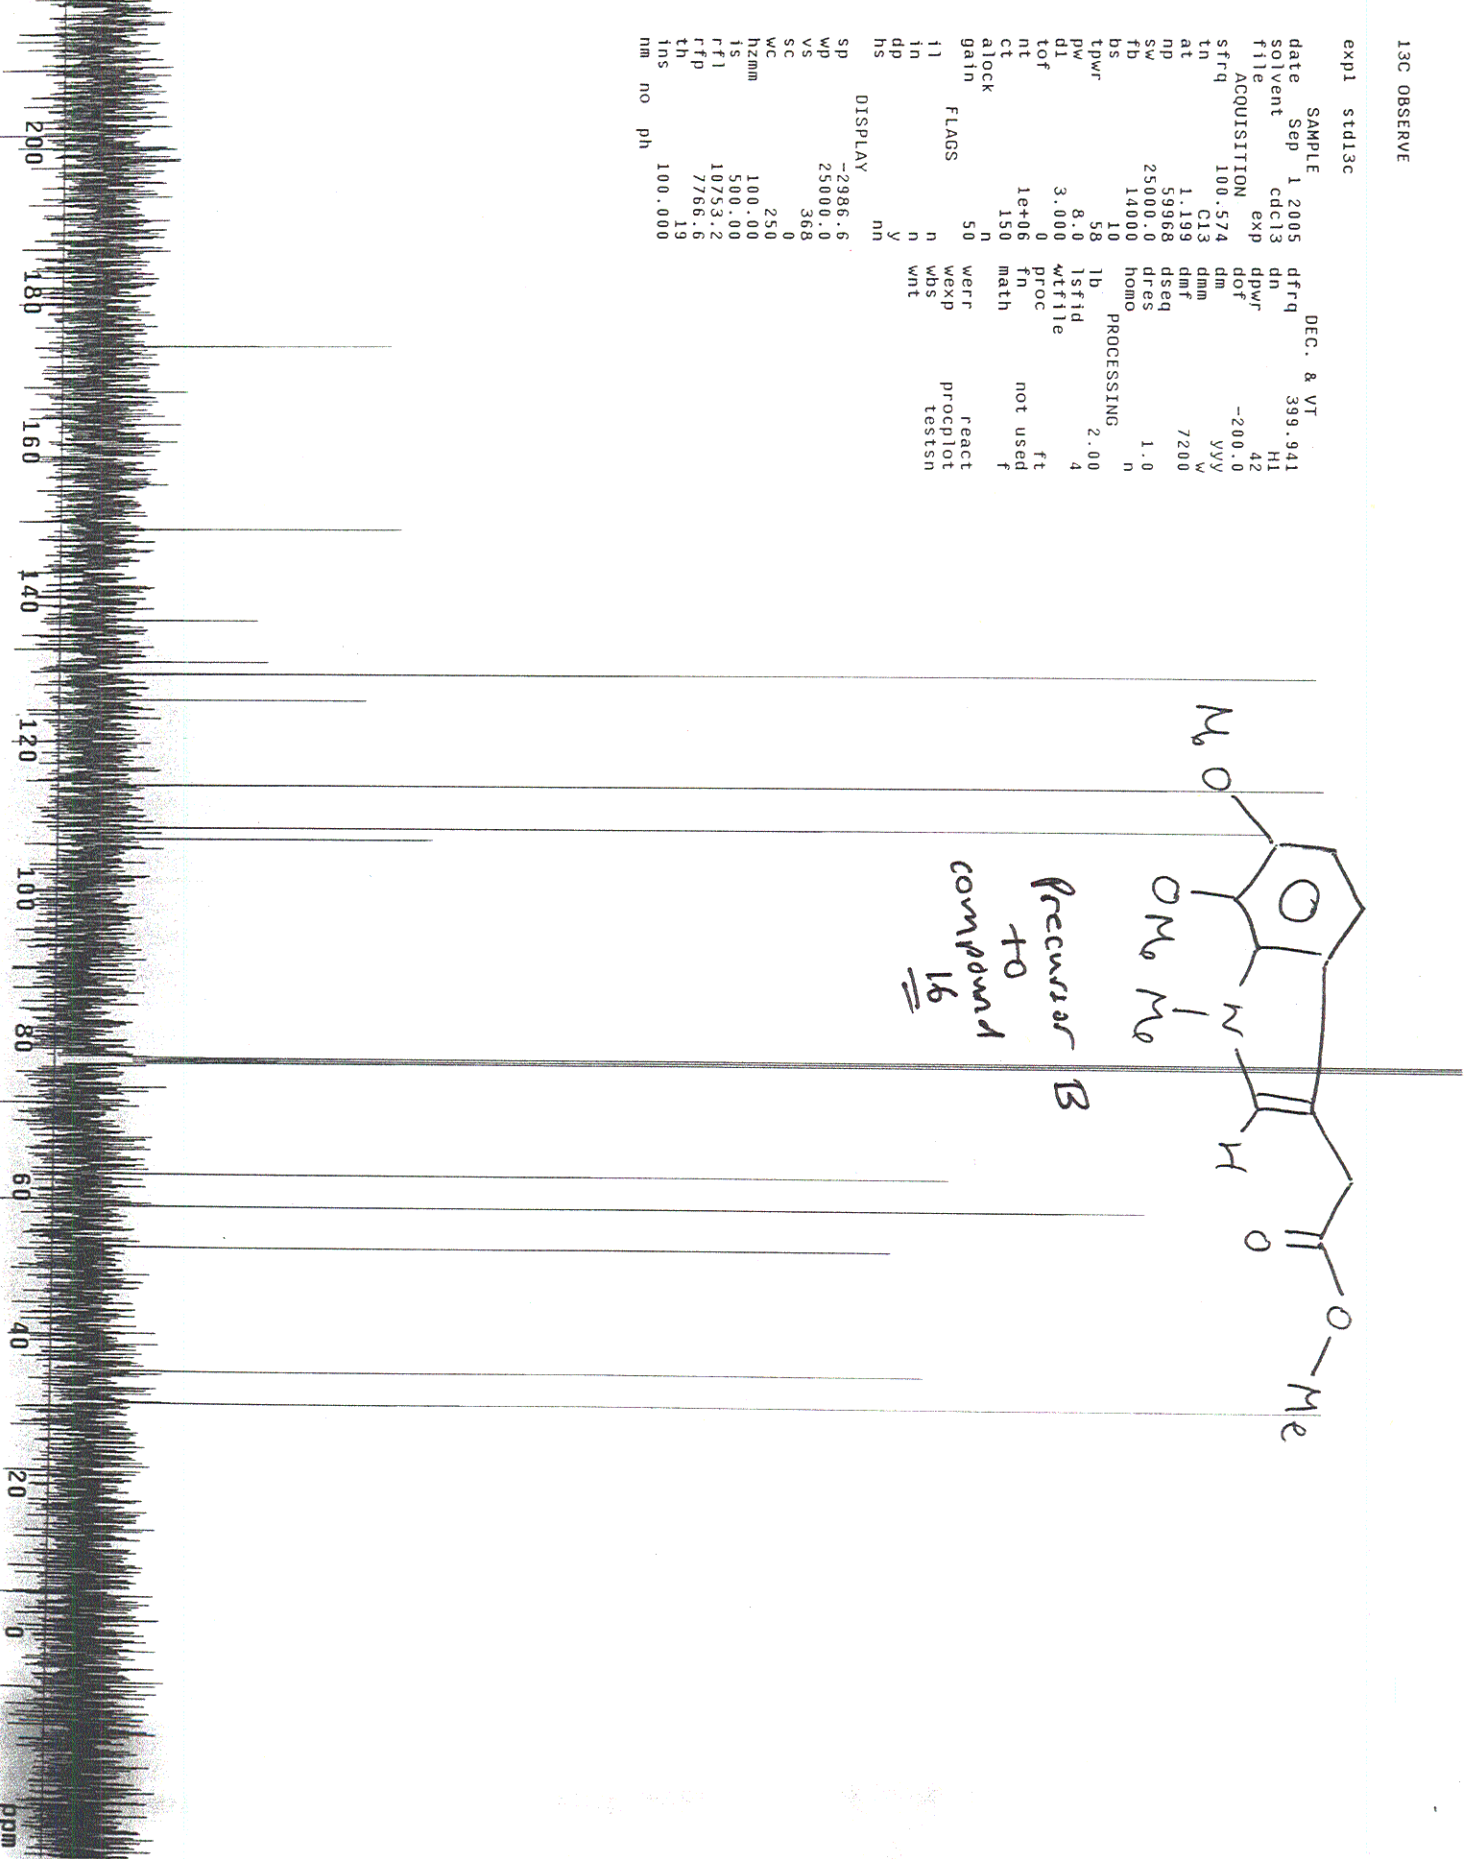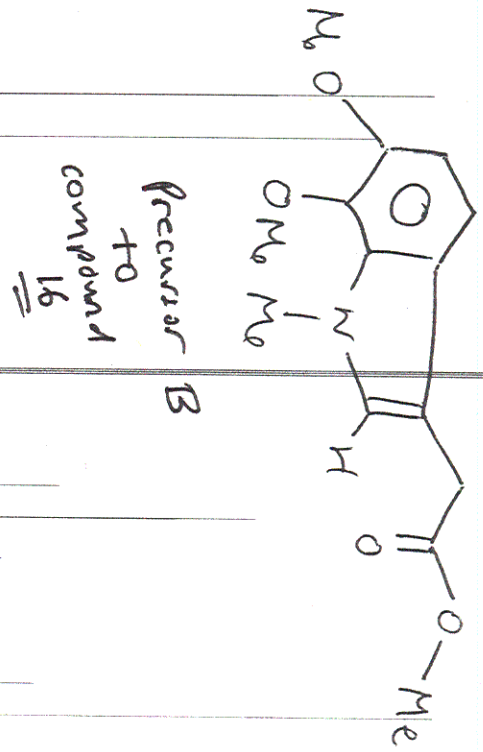

STANDARD 1H OBSERVE

```

expt  std1h
SAMPLE
date Sep 1 2005 dfrq DEC. & VT 399.940
solvent cdc13 dn HI
file ACQUISITION exp dpwr HI
sfrq 399.941 dm -630.7
at 2.202 dmm nnn
np 22912 dseq C
sw 5203.3 dres 200
fb 3000 homo 1.0
bs 1 PROCESSING n
tpwr 58 1b 0.20
pw 8.0 ,wrtfile
d1 1.000 proc ft
tof 207.0 fn not used
nt 30 math f
ct 30
alock gain n warr react
gain not used wexp procpilot
flags not used wds
l1 n wht
l2 n
l3 n
dp y
hs nn
DISPLAY
SP -386.3
WD 5203.3
VS 144
SC 0
WC 250
h2mm 20.81
IS 231.46
rfl 3293.8
th 2907.6
ins 1.12
nm cdc ph 1.000
  
```

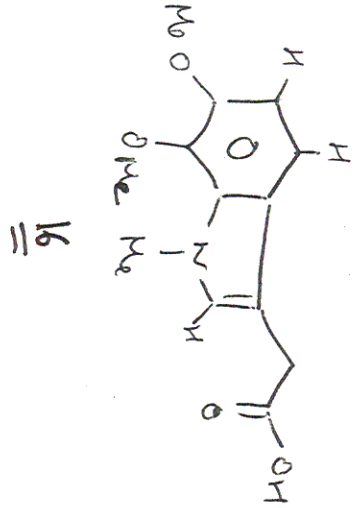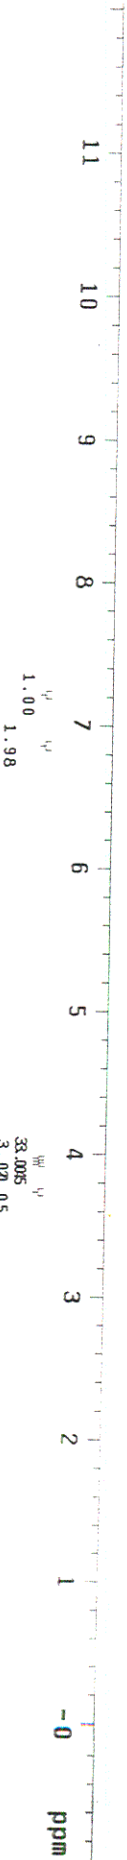

33.0065  
3.021.05

STANDARD 1H OBSERVE

expl std1h

|         |             |          |          |           |         |
|---------|-------------|----------|----------|-----------|---------|
| date    | 8 Sep       | 8 2005   | dfreq    | DEC. & VT | 399.940 |
| solvent | cdcl3       | dn       | dn       |           | H1      |
| file    | ACQUISITION | exp      | dpwr     |           | 30      |
| sfreq   | 399.941     | dm       | dof      |           | -630.7  |
| tn      | H1          | dmm      | dmf      |           | nnn     |
| at      | 2.202       | dseq     | dres     |           | C       |
| np      | 22912       | math     | hom      |           | 200     |
| sw      | 5203.3      | react    | procplot |           | 1.0     |
| fb      | 3000        | proc     | ft       |           | n       |
| bs      | 1           | math     | f        |           | n       |
| tpwr    | 58          | react    | ft       |           | 0.20    |
| pw      | 8.0         | proc     | f        |           | 1.000   |
| dl      | 1.000       | math     | f        |           | 207.0   |
| tof     | 207.0       | react    | f        |           | 40      |
| nt      | 40          | procplot | f        |           | 0       |
| ct      | 0           |          |          |           | 0       |
| alock   | not used    |          |          |           | 0       |
| gain    | not used    |          |          |           | 0       |
| fl      | n           |          |          |           | n       |
| in      | n           |          |          |           | n       |
| dp      | y           |          |          |           | y       |
| hs      | nn          |          |          |           | nn      |
| DISPLAY |             |          |          |           |         |
| sp      | -386.3      |          |          |           |         |
| wp      | 5203.3      |          |          |           |         |
| vs      | 144         |          |          |           |         |
| sc      | 0           |          |          |           |         |
| wc      | 250         |          |          |           |         |
| hzmm    | 20.81       |          |          |           |         |
| ts      | 271.35      |          |          |           |         |
| rfl     | 3293.8      |          |          |           |         |
| rflp    | 2907.6      |          |          |           |         |
| th      | 20          |          |          |           |         |
| ins     | 9.000       |          |          |           |         |
| nm      | cdc         |          |          |           |         |
| ph      |             |          |          |           |         |

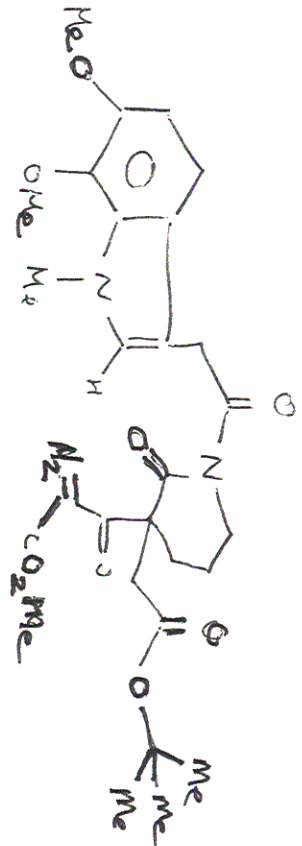

10

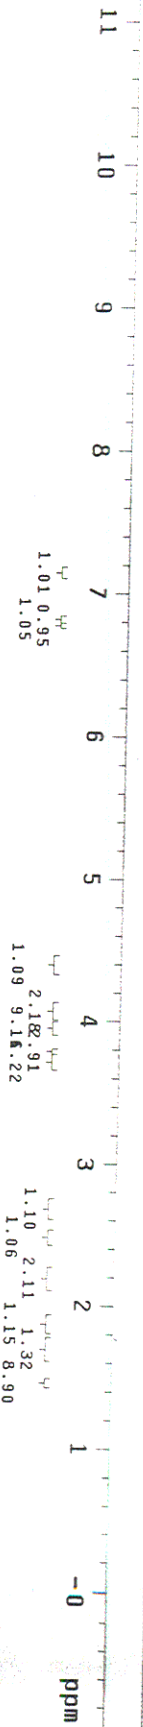

STANDARD 1H OBSERVE

exptl std1h

|             |            |            |           |
|-------------|------------|------------|-----------|
| date        | Oct 5 2005 | DEC. & VT  | 399.940   |
| solvent     | cdcl3      | dn         | H1        |
| file        | exp        | dpwr       | 30        |
| ACQUISITION | dof        | dof        | -630.7    |
| sfrq        | 399.941    | dm         | nmn       |
| tn          | H1         | dmm        | C         |
| at          | 2.202      | dmf        | 200       |
| np          | 22912      | dseq       |           |
| sw          | 5203.3     | dres       | 1.0       |
| fd          | 3000       | homo       | n         |
| bs          | 1          | PROCESSING | 0.20      |
| tpwr        | 58         | lb         | wf file   |
| pw          | 8.0        | 'proc      | ft        |
| dl          | 1.000      | fn         | not used  |
| tof         | 207.0      | math       | f         |
| nt          | 100        | werr       | react     |
| ct          | 0          | wexp       | procpilot |
| gain        | not used   | wps        |           |
| flags       | not used   | wnt        |           |
| tl          | n          |            |           |
| in          | n          |            |           |
| dd          | y          |            |           |
| hs          | nm         |            |           |
| DISPLAY     |            |            |           |
| sp          | -425.0     |            |           |
| wp          | 5203.3     |            |           |
| vs          | 144        |            |           |
| sc          | 0          |            |           |
| wc          | 250        |            |           |
| hzm         | 20.81      |            |           |
| is          | 236.57     |            |           |
| rfl         | 3332.6     |            |           |
| rff         | 2907.6     |            |           |
| th          | 20         |            |           |
| ins         | 9.000      |            |           |
| nm          | cdc        |            |           |
| ph          |            |            |           |

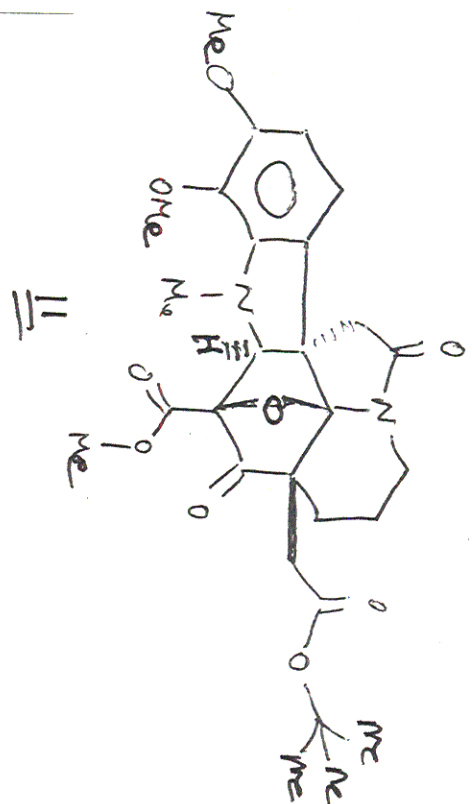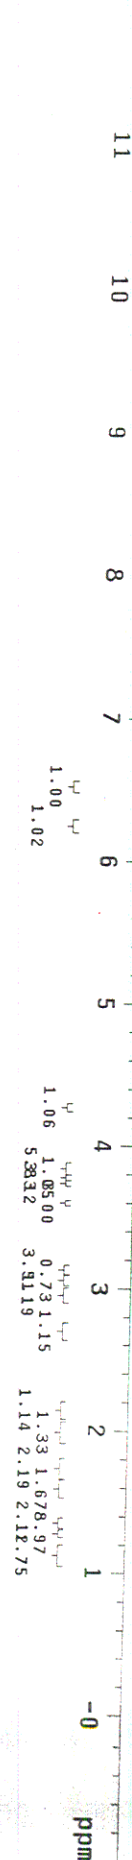

STANDARD 1H OBSERVE

expl std1h

|             |             |            |           |
|-------------|-------------|------------|-----------|
| date        | Oct 12 2005 | DEC. & VT  | 399.940   |
| solvent     | cdcl3       | dn         | H1        |
| file        | exp         | dpwr       | 30        |
| ACQUISITION |             | dof        | -630.7    |
| sfrq        | 399.941     | dm         | nmn       |
| tn          | H1          | dmm        | C         |
| at          | 2.202       | dmt        | 200       |
| np          | 2.2912      | dseq       |           |
| sw          | 5203.3      | dres       | 1.0       |
| td          | 3000        | homo       | n         |
| bs          | 1           | PROCESSING |           |
| tpwr        | 58          | lb         | 0.20      |
| pw          | 8.0         | wffile     |           |
| dl          | 1.000       | proc       | ft        |
| tof         | 207.0       | fn         | not used  |
| nt          | 100         | math       | f         |
| cl          | 56          | werr       | react     |
| alock       | n           | wexp       | procpilot |
| gain        | not used    | wbs        | wht       |
| ll          | n           |            |           |
| in          | n           |            |           |
| dp          | y           |            |           |
| hs          | nn          |            |           |
| DISPLAY     |             |            |           |
| sp          | -386.0      |            |           |
| wp          | 5203.3      |            |           |
| vs          | 144         |            |           |
| sc          | 0           |            |           |
| wc          | 250         |            |           |
| hzm         | 20.81       |            |           |
| is          | 802.28      |            |           |
| rfl         | 3293.5      |            |           |
| rtp         | 2907.6      |            |           |
| th          | 20          |            |           |
| ins         | 20          |            |           |
| nm          | 1.000       |            |           |

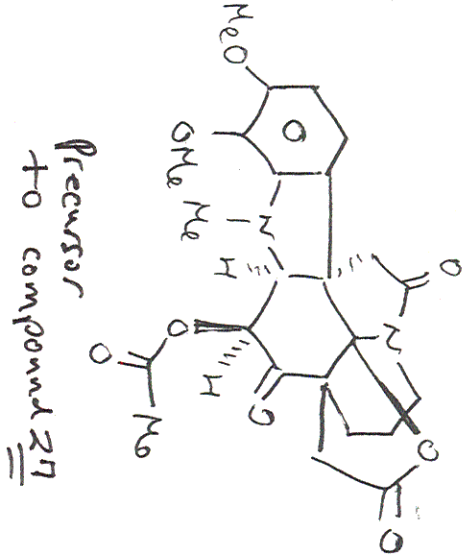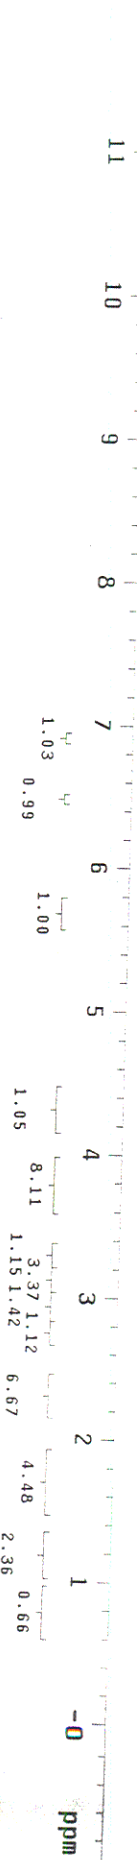



STANDARD 1H OBSERVE

exp1 std1h

|             |             |            |           |          |
|-------------|-------------|------------|-----------|----------|
| date        | Jan 26 2006 | dfreq      | DEC. & VT | 399.940  |
| solvent     | cdcl3       | dn         |           | H1       |
| file        |             | dpwr       |           | 30       |
| ACQUISITION | exp         | dof        |           | -630.7   |
| sfrq        | 399.941     | dm         |           | nmn      |
| tn          |             | dmm        |           | C        |
| at          | 2.202       | dmg        |           | 200      |
| np          | 22912       | dseq       |           |          |
| sw          | 5203.3      | dres       |           | 1.0      |
| fb          | 3000        | homo       |           | n        |
| bs          |             | PROCESSING |           |          |
| tpwr        | 58          | lb         |           | 0.20     |
| pw          | 8.0         | wffile     |           |          |
| dl          | 1.000       | proc       |           | ft       |
| tof         | 207.0       | fn         |           | not used |
| nt          | 50          | math       |           | f        |
| ct          | 50          |            |           |          |
| alock       | n           | werr       | react     |          |
| gain        | not used    | wexp       | procpilot |          |
| FLAGS       |             | wps        |           |          |
| fl          | n           | wt         |           |          |
| in          | n           |            |           |          |
| dp          | y           |            |           |          |
| hs          | nn          |            |           |          |
| DISPLAY     |             |            |           |          |
| SP          | -386.3      |            |           |          |
| WP          | 5203.3      |            |           |          |
| VS          | 197         |            |           |          |
| SC          | 0           |            |           |          |
| WC          | 250         |            |           |          |
| hzmm        | 20.81       |            |           |          |
| ts          | 2958.92     |            |           |          |
| rfl         | 3293.8      |            |           |          |
| rtp         | 2907.6      |            |           |          |
| th          | 20          |            |           |          |
| ins         | 1.000       |            |           |          |
| nm          | cdc         | ph         |           |          |

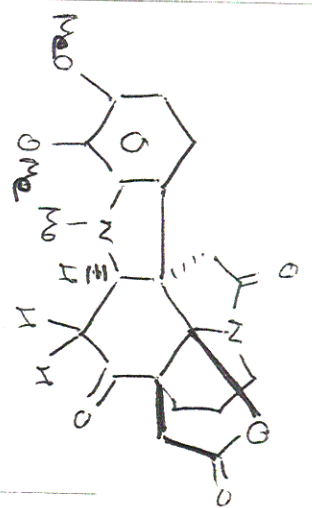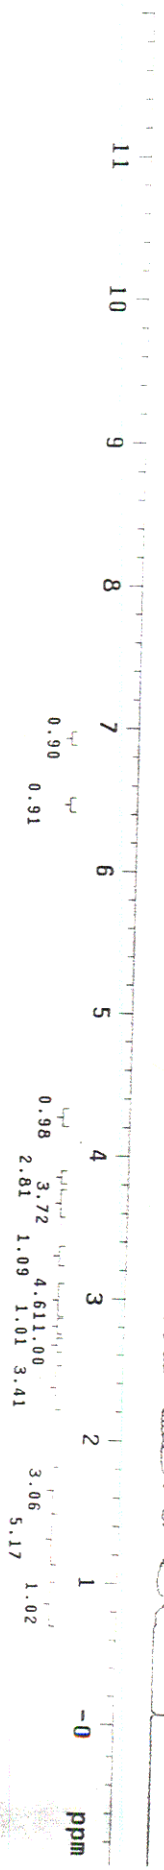

STANDARD 1H OBSERVE

exp1 std1h

SAMPLE 2 2006 DEC. & VT  
 date Feb 2006 dfreq 399.940  
 solvent cdcl3 dn  
 file exp dpwr  
 ACQUISITION exp dof -630.7  
 sfreq 399.941 dm  
 tn H1 dmm  
 at 2.202 dmf  
 np 22912 dseq  
 sw 5203.3 dres  
 fb 3000 homo 1.0  
 bs 1  
 tpwr 58 1b  
 pw 8.0 wfile 0.20  
 dl 1.000 proc ft  
 tof 207.0 fn not used  
 nt 100 math  
 ct 94  
 alock n  
 gain not used  
 flags not used  
 i1 n  
 i2 n  
 in y  
 dp y  
 hs nn  
 DISPLAY  
 sp -386.3  
 wp 5203.3  
 vs 921  
 sc 0  
 wc 250  
 hzmm 20.81  
 ts 2734.18  
 rfl 386.3  
 rfp 0  
 th 20  
 lns 2.000  
 nm cdc ph

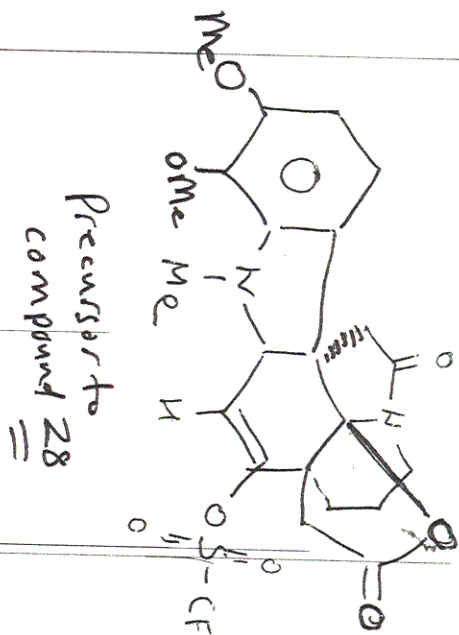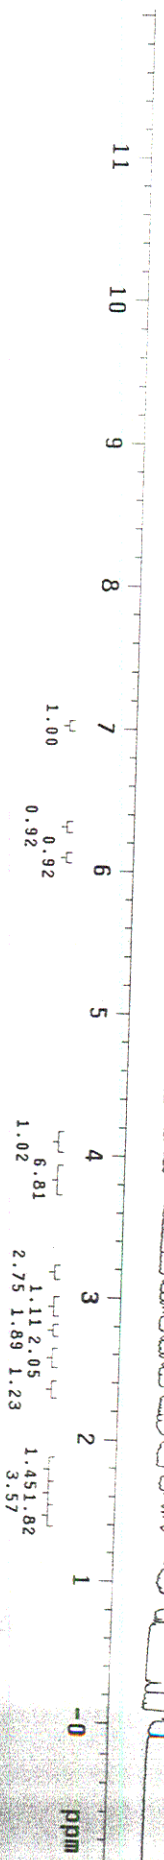

STANDARD 1H OBSERVE

```

expl stidh
SAMPLE
date Feb 4 2006
solvent cdcl3
file exp
ACQUISITION
sfrq 399.941
tn H1
at 2.202
np 22912
sw 5203.3
fb 3000
bs 1
tpwr 58
pw 8.0
dl 1.000
tof 207.0
nt 100
ct 100
alock n
gain not used
flags not used
i1 n
in y
dp n
hs nm
DISPLAY
SP -386.3
WP 5203.3
VS 144
SC 0
WC 250
hzmm 20.81
fs 1435.53
rf1 3293.8
rfp 2907.6
tn 20
nm cdc ph 7.000
    
```

```

DEC. & VT
dfrq 399.940
dn H1
dpwr 30
dot -630.7
dmm nm
dmf 200
dseq 200
dres 1.0
homo n
PROCESSING
lb 0.20
wtfile
proc ft
fn not used
math f
werr react
wexp procpilot
wbs
wnt
    
```

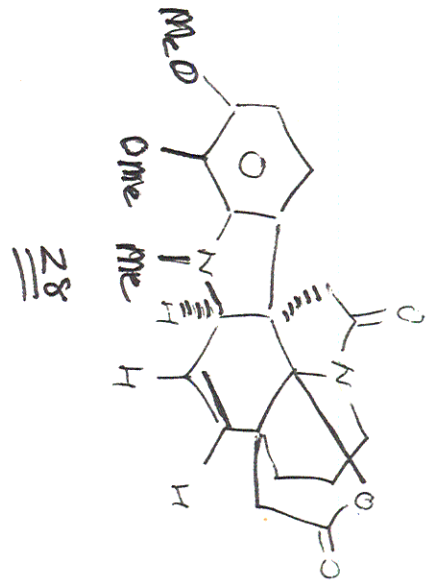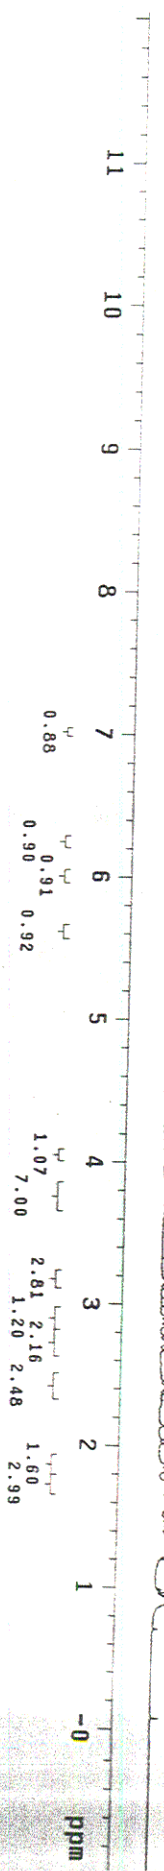

Standard proton parameters  
exp3 s2pul

|             |          |            |           |
|-------------|----------|------------|-----------|
| SAMPLE      | 4.2006   | DEC. & VI  | 599.738   |
| date        | Feb      | dfreq      | H1        |
| solvent     | cdcl3    | dn         | 0         |
| title       | exp      | dpwr       | 0         |
| ACQUISITION |          | dof        | 0         |
| sfrq        | 599.738  | dm         | nmn       |
| tn          | H1       | dmm        | w         |
| at          | 1.598    | dmf        | 200       |
| np          | 24948    | dseq       |           |
| sw          | 7804.1   | dres       | 1.0       |
| fb          | 4000     | homo       | n         |
| bs          | 1        | PROCESSING |           |
| tpwr        | 56       | lb         | 0.20      |
| pw          | 5.0      | wfile      |           |
| d1          | 1.000    | proc       | ft        |
| tof         | 285.3    | fq         | not used  |
| nt          | 100      | math       | f         |
| ct          | 0        |            |           |
| alock       | n        | werr       | react     |
| gain        | not used | wexp       | procpilot |
| FLAGS       |          | wbs        | testsn    |
| ll          | n        | wnt        |           |
| in          | n        |            |           |
| dp          | v        |            |           |
| hs          | nm       |            |           |
| DISPLAY     |          |            |           |
| sp          | -603.1   |            |           |
| wp          | 7804.1   |            |           |
| vs          | 151      |            |           |
| sc          | 0        |            |           |
| wc          | 250      |            |           |
| hzmh        | 31.22    |            |           |
| is          | 1006.75  |            |           |
| rfl         | 603.1    |            |           |
| rftp        | 0        |            |           |
| th          | 68       |            |           |
| ins         | 1.000    |            |           |
| nm          | cdc      | ph         |           |

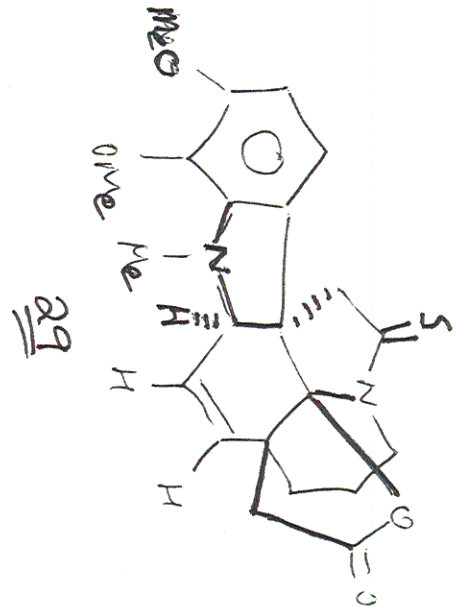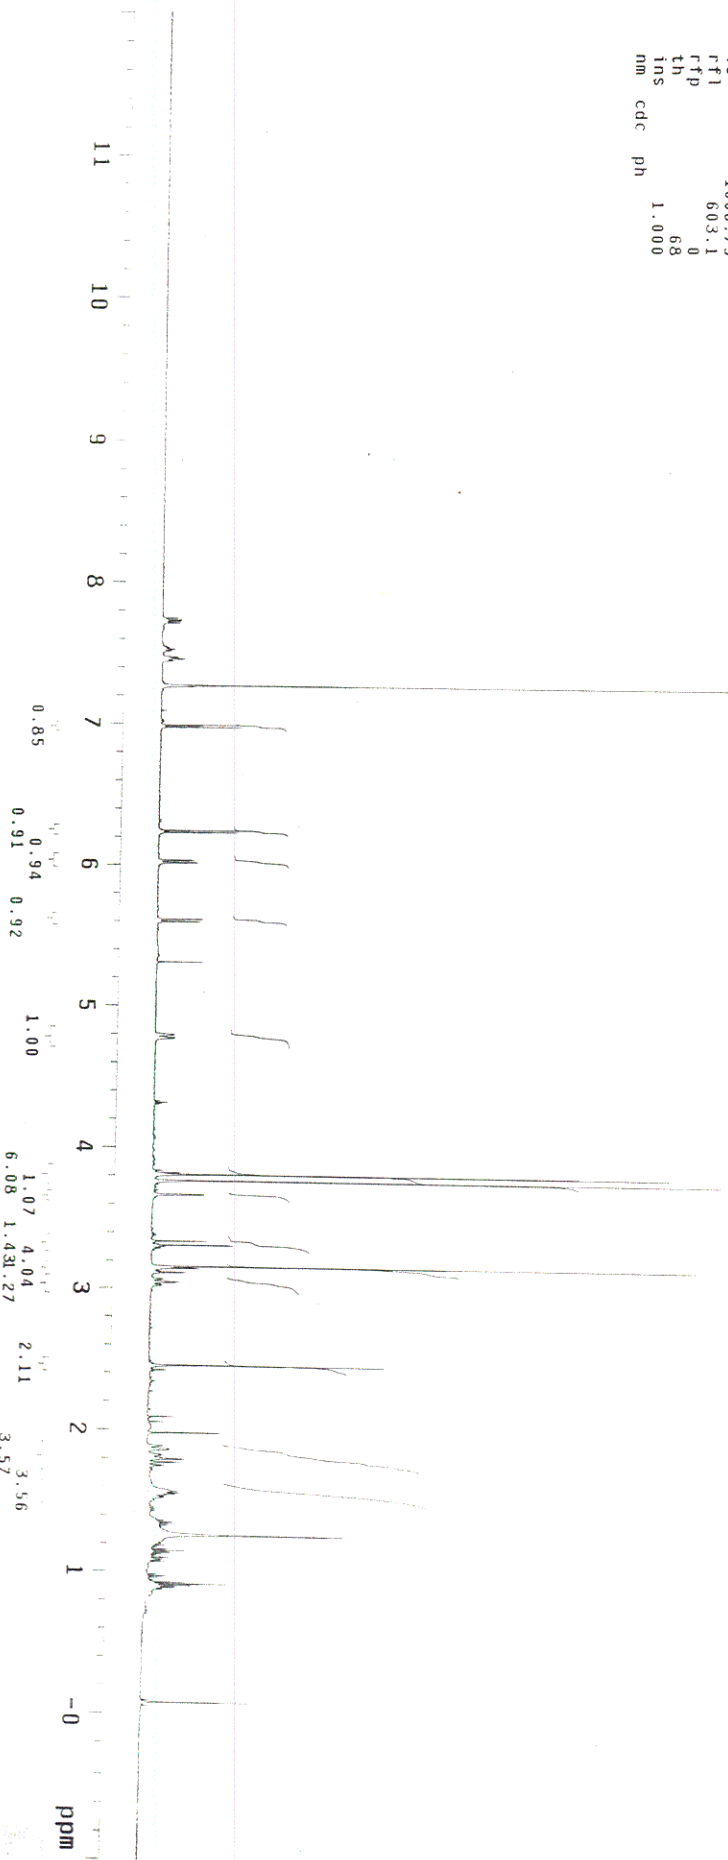

Standard Proton Parameters

```

exp1 s2pul1
SAMPLE Mar 24 2006 DEC. & VI 599.738
date Mar 24 2006 dfreq 599.738
solvent cdcl3 dn HI 0
file exp13 dnm 0
ACQUISITION dpmr 0
sfrq 599.738 dm 0
tn HI dmm nmn
at 1.598 dmf w
np 24948 dser 200
sw 7804.1 dres 1.0
td 4000 homo n
bs 1 PROCESSING
tpwr 56 lb 0.20
pw 5.0 wfile
dl 1.000 proc ft
tof 285.3 fn not used
nt 10000 math f
ct 0
alock 0
gain not used werr react
flags not used wexp procpilot
hs n Y wbs testis
nm cdc ph 1.000
  
```

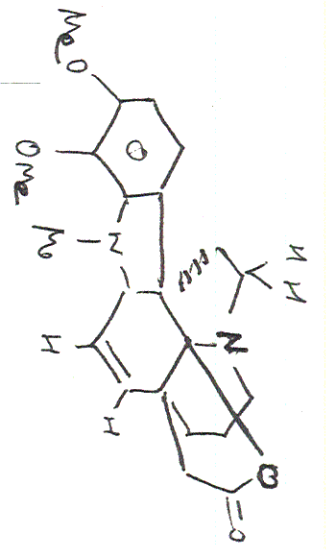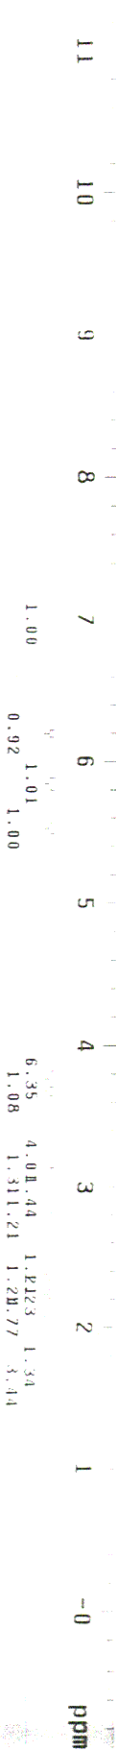

Supplement: NIHMS57672-supplement-1.pdf [file NIHMS57672-supplement-1.pdf]
